# Supplementary material for: Evaluating the performance of low-frequency variant calling tools for the detection of variants from short-read deep sequencing data
Source: PubMed Central journal article supplement (PMC10665316; doi:10.1038/s41598-023-47135-3), 2023-11-22
Supplement: 41598_2023_47135_MOESM1_ESM.pdf [file 41598_2023_47135_MOESM1_ESM.pdf]

Supplementary Information  
for  
Evaluating the performance of low-frequency variant  
calling tools for the detection of variants from short-read  
deep sequencing data

Xudong Xiang <sup>a</sup>, Bowen Lu <sup>a</sup>, Dongyang Song <sup>a</sup>, Jie Li <sup>a</sup>, Kunxian Shu <sup>a,\*</sup>, Dan Pu <sup>a,\*</sup>

<sup>a</sup> Chongqing Key Laboratory of Big Data for Bio Intelligence, Chongqing University of Posts and Telecommunications, Chongqing, China, 400065.

\* To whom correspondence should be addressed. E-mail: shukx@cqupt.edu.cn; pudan@cqupt.edu.cn

## Supplementary Methods

### Generation of simulated data

We used the following UMI-Gen command for the generation of simulated datasets. To generate data containing mutations with various VAFs at different sequencing depths, we set **-d** to 1000, 5000, 10000, 15000, 20000, and 25000, and variant allele frequency in **variants.csv** was set to 0.1, 0.05, 0.025, 0.01, 0.005, 0.0025, 0.001, 0.0005, 0.00025, respectively. Therefore, a total of 54 sets of UMI-tagged paired-end reads (2×110bp) with various VAF levels and sequencing depths were generated.

```
Python3 umi-gen.py snv -i Control_1.bam, Control_2.bam, Control_3.bam -f Ref_hg19.fa -b Target_region.bed -v Variants.csv -o Output_dir -n Name -d Depth
```

### Data processing pipelines

#### 1. Simulated data

For input data of SiNVICT, outLyzer, Pisces, LoFreq, UMI-VarCal, and smCounter2, we conducted the following processing pipeline. Note that the last additional step was performed only for input data of smCounter2.

##### a. Read filtering (FASTP 0.23.2)

```
fastp -A -i Raw_R1.fastq -I Raw_R2.fastq -o QCed_R1.fastq -O QCed_R1.fastq
```

##### b. Read alignment (BWA-MEN 0.7.17-r1188)

```
bwa mem -t 36 Ref_hg19.fa QCed_R1.fastq QCed_R1.fastq >input.sam
```

##### c. Post alignment filtering (SAMtools 1.9)

```
i. samtools view -Sb -F 2316 -f 2 -@ 36 input.sam | samtools sort -@ 36 -o input_Ff.bam
```

```
ii. samtools index -@ 36 input_Ff.bam
```

##### d. Base quality score recalibration (LoFreq 2.1.5)

```
i. LoFreq viterbi -f Ref_hg19.fa -k input_Ff.bam | samtools sort -@ 36 -o input_recal.bam
```

```
ii. samtools index -@ 36 input_recal.bam
```

##### e. Add UMI to Mi tag (**Note: for smCounter2 only**)

```
Python3 add_UMI.py input_recal.bam input_recal_Mi.bam
```

For input data of DeepSNVMiner and MAGERI, we conducted the following processing pipeline.

##### a. Read filtering (FASTP 0.23.2)

```
fastp -A -i Raw_R1.fastq -I Raw_R2.fastq -o QCed_R1.fastq -O QCed_R1.fastq
```

##### b. Extraction of UMI tags

- Python3 extract\_umi\_MAGERI.py QCed\_R1.fastq QCed\_R1.fastq MAGERI\_R1.fastq MAGERI\_R2.fastq  
(For MAGERI)
- Python3 extract\_umi\_DeepSNVMiner.py QCed\_R1.fastq QCed\_R1.fastq DeepSNVMiner\_R1.fastq  
DeepSNVMiner\_R2.fastq (For DeepSNVMiner)

## 2. Reference data and Horizon Tru-Q sample data

For input data of SiNVICT, outLyzer, Pisces, LoFreq, and UMI-VarCal, we conducted the following processing pipeline.

Note that the last step was performed for input data of smCounter2.

### a. Read filtering (FASTP 0.23.2)

```
fastp -A -i Raw_R1.fastq -I Raw_R2.fastq -o QCed_R1.fastq -O QCed_R1.fastq
```

### b. Read trimming

```
Python3 read_trimmer.py --r1 QCed_R1.fastq --r2 QCed_R2.fastq --out-r1 Trimmed_R1.fastq --out-r2  
Trimmed_R2.fastq --out-metrics Metrics.txt --primer-file Primer3.txt --primer-col 3 --umi-len 12 --common-seq-len  
11
```

### c. Read alignment (BWA-MEM 0.7.17-r1188)

```
bwa mem -t 36 Ref_hg19.fa Trimmed_R1.fastq Trimmed_R2.fastq >input.sam
```

### d. Post alignment filtering (SAMtools 1.9)

```
i. samtools view -Sb -F 2316 -f 2 -@ 36 input.sam | samtools sort -@ 36 -o input_Ff.bam
```

```
ii. samtools index -@ 36 input_Ff.bam
```

### e. Base quality score recalibration (LoFreq 2.1.5)

```
i. LoFreq viterbi -f Ref_hg19.fa -k input_Ff.bam | samtools sort -@ 36 -o input_recal.bam
```

```
ii. samtools index -@ 36 input_recal.bam
```

### f. Add UMI to Mi tag (**Note: for smCounter2 only**)

```
Python3 add_UMI.py input_recal.bam input_recal_Mi.bam
```

For input data of DeepSNVMiner and MAGERI, we conducted the following processing pipeline.

### a. Read filtering (FASTP 0.23.2)

```
fastp -A -i Raw_R1.fastq -I Raw_R2.fastq -o QCed_R1.fastq -O QCed_R1.fastq
```

### b. Read trimming

```
Python3 read_trimmer.py --r1 QCed_R1.fastq --r2 QCed_R2.fastq --out-r1 Trimmed_R1.fastq --out-r2  
Trimmed_R2.fastq --out-metrics Metrics.txt --primer-file Primer3.txt --primer-col 3 --umi-len 12 --common-seq-len  
11
```

### c. Extraction of UMI tags

- Python3 extract\_umi\_MAGERI.py Trimmed\_R1.fastq Trimmed\_R2.fastq MAGERI\_R1.fastq  
MAGERI\_R2.fastq (For MAGERI)
- Python3 extract\_umi\_DeepSNVMiner.py Trimmed\_R1.fastq Trimmed\_R2.fastq DeepSNVMiner\_R1.fastq  
DeepSNVMiner\_R2.fastq (For DeepSNVMiner)

## Variant calling

We used the following SiNVICT command for all datasets.

1. bam-readcount -w1 -f Ref\_hg19.fa input\_recal.bam -l Region.txt >readcount\_dir/ sim\_recal.readcount
2. sinvict -t readcount\_dir/ -o output\_dir/

We used the following outLyzer command for all datasets.

```
python3 outLyzer.py calling -ref Ref_hg19.fa -bam input_recal.bam -bed Target_region.bed -output output_dir/
```

We used the following Pisces command for all datasets.

1. CreateGenomeSizeFile -s "Human (UCSC hg19)" -g Ref\_hg19\_dir/ -o Ref\_hg19\_dir/
2. Pisces -b input\_recal.bam -g Ref\_hg19\_dir -i Target\_region.bed -o output\_dir --gvcf false --callmnvs false --  
filterduplicates true --ssfilter true

We used the following LoFreq command for simulated datasets. For N0015, N13532, M0253, there was no -s set.

```
LoFreq call-parallel -s -f Ref_hg19.fa -o output.vcf -l Target_region.bed input_recal.bam
```

We used the following DeepSNVMiner command for simulated datasets. For N0015, N13532, M0253, -sm\_count was set to 20 and -min\_group was set to 5.

```
run_deepseq.pl -read1_fastq DeepSNVMiner_R1.fastq -read2_fastq DeepSNVMiner_R2.fastq -ref_fasta  
Ref_hg19.fa -filename_stub output -coord_bed Target_region.bed -working_dir output_dir -no_adaptor -uid_done  
-sm_count 10 -min_group 2 -bwa /path/to/bwa -samtools /path/to/samtools
```

We used the following MAGERI command for all datasets.

1. bedtools getfasta -ref Ref\_hg19.fa -bed Target\_region.bed --fo Target\_region.fa
2. java -Xmx200g -jar MAGERI.jar -M4 -R1 MAGERI\_R1.fastq -R2 MAGERI\_R2.fastq --bed Target\_region.bed  
--references Target\_region.fa -O output\_dir --project-name project\_name --sample-name sample\_name

We used the following smCounter2 command for simulated datasets. For N0015, N13532, M0253, --minAltUMI was

set to 3.

```
Python2 smCounter2.py --bamFile input_recal.bam --refGenome Ref_hg19.fa --bedTarget Target_region.bed --  
runPath output_dir --outPrefix output_prefix --minAltUMI 1
```

We used the following UMI-VarCal command for simulated datasets. For N0015, N13532, M0253, --min\_variant\_umi was set to 5 and --min\_variant\_depth was set to 5.

```
Python3 UMI-VarCal.py call -i input_recal.bam -b Target_region.bed -f Ref_hg19.fa -o output_dir --gvcf False --  
keep_pileup False --min_variant_umi 1 --min_variant_depth 1
```

## Supplementary Tables

**Table S1.** List of regions for target sequencing of simulated datasets in the required BED file.

| Chromosome | ChromStart | ChromEnd | Chromosome | ChromStart | ChromEnd  |
|------------|------------|----------|------------|------------|-----------|
| chr1       | 2488028    | 2488202  | chr1       | 27100803   | 27101749  |
| chr1       | 2489134    | 2489299  | chr1       | 27102061   | 27102220  |
| chr1       | 2489769    | 2489922  | chr1       | 27105487   | 27107269  |
| chr1       | 2491197    | 2491487  | chr1       | 117057340  | 117057467 |
| chr1       | 2492024    | 2492195  | chr1       | 117061767  | 117061983 |
| chr1       | 2493106    | 2493327  | chr1       | 117064459  | 117064637 |
| chr1       | 2494277    | 2494400  | chr1       | 117078575  | 117078867 |
| chr1       | 2494550    | 2494737  | chr1       | 117086892  | 117087259 |
| chr1       | 23885399   | 23885521 | chr1       | 117113455  | 117113657 |
| chr1       | 23885571   | 23885958 | chr1       | 120457915  | 120459331 |
| chr1       | 27022885   | 27024142 | chr1       | 120464845  | 120465089 |
| chr1       | 27056127   | 27056382 | chr1       | 120465250  | 120465407 |
| chr1       | 27057601   | 27058143 | chr1       | 120466253  | 120466632 |
| chr1       | 27059133   | 27059288 | chr12      | 57493709   | 57493956  |
| chr1       | 27087326   | 27087634 | chr12      | 57496008   | 57496313  |
| chr1       | 27087766   | 27087982 | chr12      | 57496569   | 57496803  |
| chr1       | 27088634   | 27088816 | chr12      | 57498218   | 57498386  |
| chr1       | 27089442   | 27089799 | chr12      | 57498477   | 57498616  |
| chr1       | 27092687   | 27092862 | chr12      | 57498919   | 57499133  |
| chr1       | 27092942   | 27093076 | chr13      | 41133651   | 41135056  |
| chr1       | 27094275   | 27094498 | chr13      | 41239711   | 41240436  |
| chr1       | 27097600   | 27097823 | chr15      | 45003694   | 45003859  |
| chr1       | 27098985   | 27099130 | chr15      | 45007612   | 45007927  |
| chr1       | 27099295   | 27099483 | chr15      | 45008466   | 45008575  |
| chr1       | 27099831   | 27100413 | chrX       | 100610986  | 100611268 |

**Table S2.** List of regions for target sequencing of simulated data. 50 known SNVs were randomly generated for the simulation of mutations.

| <b>chromosome</b> | <b>position</b> | <b>reference</b> | <b>alternation</b> | <b>chromosome</b> | <b>position</b> | <b>reference</b> | <b>alternation</b> |
|-------------------|-----------------|------------------|--------------------|-------------------|-----------------|------------------|--------------------|
| chr1              | 2488090         | T                | G                  | chr1              | 27101496        | G                | T                  |
| chr1              | 2489135         | A                | T                  | chr1              | 27102063        | T                | A                  |
| chr1              | 2489816         | G                | A                  | chr1              | 27105652        | A                | G                  |
| chr1              | 2491206         | G                | C                  | chr1              | 117057456       | A                | C                  |
| chr1              | 2492094         | C                | G                  | chr1              | 117061775       | T                | C                  |
| chr1              | 2493152         | A                | G                  | chr1              | 117064480       | A                | C                  |
| chr1              | 2494365         | C                | G                  | chr1              | 117078714       | T                | G                  |
| chr1              | 2494674         | A                | G                  | chr1              | 117087055       | A                | C                  |
| chr1              | 23885437        | A                | T                  | chr1              | 117113503       | C                | T                  |
| chr1              | 23885584        | G                | T                  | chr1              | 120459167       | G                | T                  |
| chr1              | 27022889        | G                | A                  | chr1              | 120464891       | A                | C                  |
| chr1              | 27056361        | G                | A                  | chr1              | 120465269       | C                | G                  |
| chr1              | 27057804        | A                | T                  | chr1              | 120466280       | T                | C                  |
| chr1              | 27059271        | C                | T                  | chr12             | 57493827        | C                | A                  |
| chr1              | 27087532        | T                | G                  | chr12             | 57496213        | T                | C                  |
| chr1              | 27087898        | C                | G                  | chr12             | 57496582        | T                | A                  |
| chr1              | 27088797        | G                | A                  | chr12             | 57498308        | C                | G                  |
| chr1              | 27089666        | T                | G                  | chr12             | 57498494        | C                | A                  |
| chr1              | 27092771        | G                | T                  | chr12             | 57498951        | C                | T                  |
| chr1              | 27092998        | C                | G                  | chr13             | 41133867        | A                | C                  |
| chr1              | 27094468        | A                | T                  | chr13             | 41240184        | C                | A                  |
| chr1              | 27097724        | T                | G                  | chr15             | 45003799        | G                | A                  |
| chr1              | 27099071        | C                | A                  | chr15             | 45007629        | A                | G                  |
| chr1              | 27099481        | G                | A                  | chr15             | 45008544        | G                | C                  |
| chr1              | 27100182        | G                | T                  | chrX              | 100611134       | T                | G                  |

**Table S3.** Performance of eight low-frequency variant callers on simulated datasets with different sequencing depths (1000X, 5000X, 10000X, 15000X, 20000X, and 25000X) at a VAF of 10%.

| Variant caller | 1000X  |    |    |        |        | 5000X  |    |    |        |        | 10000X |    |    |        |        |
|----------------|--------|----|----|--------|--------|--------|----|----|--------|--------|--------|----|----|--------|--------|
|                | NC     | TP | FP | S(%)   | P(%)   | NC     | TP | FP | S(%)   | P(%)   | NC     | TP | FP | S(%)   | P(%)   |
| DeepSNVMiner   | 44     | 44 | 0  | 88.00  | 100.00 | 44     | 44 | 0  | 88.00  | 100.00 | 44     | 44 | 0  | 88.00  | 100.00 |
| MAGERI         | 43     | 41 | 2  | 82.00  | 95.35  | 41     | 41 | 0  | 82.00  | 100.00 | 41     | 41 | 0  | 82.00  | 100.00 |
| smCounter2     | 49     | 49 | 0  | 98.00  | 100.00 | 49     | 49 | 0  | 98.00  | 100.00 | 49     | 49 | 0  | 98.00  | 100.00 |
| UMI-VarCal     | 48     | 48 | 0  | 96.00  | 100.00 | 48     | 48 | 0  | 96.00  | 100.00 | 48     | 48 | 0  | 96.00  | 100.00 |
| SiNVICT        | 49     | 49 | 0  | 98.00  | 100.00 | 50     | 49 | 1  | 98.00  | 98.00  | 53     | 49 | 4  | 98.00  | 92.45  |
| outLyzer       | 50     | 50 | 0  | 100.00 | 100.00 | 51     | 50 | 1  | 100.00 | 98.04  | 51     | 50 | 1  | 100.00 | 98.04  |
| Pisces         | 50     | 49 | 1  | 98.00  | 98.00  | 57     | 49 | 8  | 98.00  | 85.96  | 59     | 49 | 10 | 98.00  | 83.05  |
| LoFreq         | 53     | 48 | 5  | 96.00  | 90.57  | 63     | 48 | 15 | 96.00  | 76.19  | 75     | 48 | 27 | 96.00  | 64.00  |
| Variant caller | 15000X |    |    |        |        | 20000X |    |    |        |        | 25000X |    |    |        |        |
|                | NC     | TP | FP | S(%)   | P(%)   | NC     | TP | FP | S(%)   | P(%)   | NC     | TP | FP | S(%)   | P(%)   |
| DeepSNVMiner   | 44     | 44 | 0  | 88.00  | 100.00 | 44     | 44 | 0  | 88.00  | 100.00 | 44     | 44 | 0  | 88.00  | 100.00 |
| MAGERI         | 41     | 41 | 0  | 82.00  | 100.00 | 41     | 41 | 0  | 82.00  | 100.00 | 41     | 41 | 0  | 82.00  | 100.00 |
| smCounter2     | 49     | 49 | 0  | 98.00  | 100.00 | 49     | 49 | 0  | 98.00  | 100.00 | 47     | 47 | 0  | 94.00  | 100.00 |
| UMI-VarCal     | 48     | 48 | 0  | 96.00  | 100.00 | 48     | 48 | 0  | 96.00  | 100.00 | 46     | 46 | 0  | 92.00  | 100.00 |
| SiNVICT        | 54     | 49 | 5  | 98.00  | 90.74  | 56     | 49 | 7  | 98.00  | 87.50  | 56     | 47 | 9  | 94.00  | 83.93  |
| outLyzer       | 52     | 50 | 2  | 100.00 | 96.15  | 52     | 50 | 2  | 100.00 | 96.15  | 50     | 48 | 2  | 96.00  | 96.00  |
| Pisces         | 62     | 49 | 13 | 98.00  | 79.03  | 62     | 49 | 13 | 98.00  | 79.03  | 60     | 47 | 13 | 94.00  | 78.33  |
| LoFreq         | 74     | 48 | 26 | 96.00  | 64.86  | 84     | 48 | 36 | 96.00  | 57.14  | 84     | 46 | 38 | 92.00  | 54.76  |

NC: number of calls; NM: number of mutations; TP: true positive; FP: false positive; S: sensitivity; P: precision.



**Table S4.** Performance of eight low-frequency variant callers on simulated datasets with different sequencing depths (1000X, 5000X, 10000X, 15000X, 20000X, and 25000X) at a VAF of 5%.

| Variant caller | 1000X  |    |    |        |        | 5000X  |    |    |        |        | 10000X |    |    |        |        |
|----------------|--------|----|----|--------|--------|--------|----|----|--------|--------|--------|----|----|--------|--------|
|                | NC     | TP | FP | S(%)   | P(%)   | NC     | TP | FP | S(%)   | P(%)   | NC     | TP | FP | S(%)   | P(%)   |
| DeepSNVMiner   | 44     | 44 | 0  | 88.00  | 100.00 | 44     | 44 | 0  | 88.00  | 100.00 | 44     | 44 | 0  | 88.00  | 100.00 |
| MAGERI         | 43     | 41 | 2  | 82.00  | 95.35  | 41     | 41 | 0  | 82.00  | 100.00 | 41     | 41 | 0  | 82.00  | 100.00 |
| smCounter2     | 49     | 49 | 0  | 98.00  | 100.00 | 49     | 49 | 0  | 98.00  | 100.00 | 49     | 49 | 0  | 98.00  | 100.00 |
| UMI-VarCal     | 48     | 48 | 0  | 96.00  | 100.00 | 48     | 48 | 0  | 96.00  | 100.00 | 48     | 48 | 0  | 96.00  | 100.00 |
| SiNVICT        | 48     | 48 | 0  | 96.00  | 100.00 | 50     | 49 | 1  | 98.00  | 98.00  | 52     | 49 | 3  | 98.00  | 94.23  |
| outLyzer       | 50     | 50 | 0  | 100.00 | 100.00 | 51     | 50 | 1  | 100.00 | 98.04  | 51     | 50 | 1  | 100.00 | 98.04  |
| Pisces         | 50     | 49 | 1  | 98.00  | 98.00  | 58     | 49 | 9  | 98.00  | 84.48  | 57     | 49 | 8  | 98.00  | 85.96  |
| LoFreq         | 50     | 46 | 4  | 92.00  | 92.00  | 60     | 47 | 13 | 94.00  | 78.33  | 76     | 47 | 29 | 94.00  | 61.84  |
| Variant caller | 15000X |    |    |        |        | 20000X |    |    |        |        | 25000X |    |    |        |        |
|                | NC     | TP | FP | S(%)   | P(%)   | NC     | TP | FP | S(%)   | P(%)   | NC     | TP | FP | S(%)   | P(%)   |
| DeepSNVMiner   | 44     | 44 | 0  | 88.00  | 100.00 | 44     | 44 | 0  | 88.00  | 100.00 | 44     | 44 | 0  | 88.00  | 100.00 |
| MAGERI         | 41     | 41 | 0  | 82.00  | 100.00 | 41     | 41 | 0  | 82.00  | 100.00 | 41     | 41 | 0  | 82.00  | 100.00 |
| smCounter2     | 49     | 49 | 0  | 98.00  | 100.00 | 50     | 49 | 1  | 98.00  | 98.00  | 47     | 47 | 0  | 94.00  | 100.00 |
| UMI-VarCal     | 48     | 48 | 0  | 96.00  | 100.00 | 48     | 48 | 0  | 96.00  | 100.00 | 46     | 46 | 0  | 92.00  | 100.00 |
| SiNVICT        | 54     | 49 | 5  | 98.00  | 90.74  | 56     | 49 | 7  | 98.00  | 87.50  | 56     | 47 | 9  | 94.00  | 83.93  |
| outLyzer       | 52     | 50 | 2  | 100.00 | 96.15  | 52     | 50 | 2  | 100.00 | 96.15  | 50     | 48 | 2  | 96.00  | 96.00  |
| Pisces         | 61     | 49 | 12 | 98.00  | 80.33  | 63     | 49 | 14 | 98.00  | 77.78  | 61     | 47 | 14 | 94.00  | 77.05  |
| LoFreq         | 79     | 48 | 31 | 96.00  | 60.76  | 91     | 48 | 43 | 96.00  | 52.75  | 91     | 46 | 45 | 92.00  | 50.55  |

NC: number of calls; NM: number of mutations; TP: true positive; FP: false positive; S: sensitivity; P: precision.

**Table S5.** Performance of eight low-frequency variant callers on simulated datasets with different sequencing depths (1000X, 5000X, 10000X, 15000X, 20000X, and 25000X) at a VAF of 2.5%.

| Variant caller | 1000X  |    |    |        |        | 5000X  |    |    |        |        | 10000X |    |    |        |        |
|----------------|--------|----|----|--------|--------|--------|----|----|--------|--------|--------|----|----|--------|--------|
|                | NC     | TP | FP | S(%)   | P(%)   | NC     | TP | FP | S(%)   | P(%)   | NC     | TP | FP | S(%)   | P(%)   |
| DeepSNVMiner   | 44     | 44 | 0  | 88.00  | 100.00 | 44     | 44 | 0  | 88.00  | 100.00 | 44     | 44 | 0  | 88.00  | 100.00 |
| MAGERI         | 43     | 41 | 2  | 82.00  | 95.35  | 41     | 41 | 0  | 82.00  | 100.00 | 41     | 41 | 0  | 82.00  | 100.00 |
| smCounter2     | 49     | 49 | 0  | 98.00  | 100.00 | 49     | 49 | 0  | 98.00  | 100.00 | 49     | 49 | 0  | 98.00  | 100.00 |
| UMI-VarCal     | 48     | 48 | 0  | 96.00  | 100.00 | 48     | 48 | 0  | 96.00  | 100.00 | 48     | 48 | 0  | 96.00  | 100.00 |
| SiNVICT        | 48     | 48 | 0  | 96.00  | 100.00 | 50     | 49 | 1  | 98.00  | 98.00  | 52     | 49 | 3  | 98.00  | 94.23  |
| outLyzer       | 50     | 50 | 0  | 100.00 | 100.00 | 51     | 50 | 1  | 100.00 | 98.04  | 51     | 50 | 1  | 100.00 | 98.04  |
| Pisces         | 50     | 49 | 1  | 98.00  | 98.00  | 58     | 49 | 9  | 98.00  | 84.48  | 57     | 49 | 8  | 98.00  | 85.96  |
| LoFreq         | 50     | 46 | 4  | 92.00  | 92.00  | 60     | 47 | 13 | 94.00  | 78.33  | 76     | 47 | 29 | 94.00  | 61.84  |
| Variant caller | 15000X |    |    |        |        | 20000X |    |    |        |        | 25000X |    |    |        |        |
|                | NC     | TP | FP | S(%)   | P(%)   | NC     | TP | FP | S(%)   | P(%)   | NC     | TP | FP | S(%)   | P(%)   |
| DeepSNVMiner   | 44     | 44 | 0  | 88.00  | 100.00 | 44     | 44 | 0  | 88.00  | 100.00 | 44     | 44 | 0  | 88.00  | 100.00 |
| MAGERI         | 41     | 41 | 0  | 82.00  | 100.00 | 41     | 41 | 0  | 82.00  | 100.00 | 41     | 41 | 0  | 82.00  | 100.00 |
| smCounter2     | 49     | 49 | 0  | 98.00  | 100.00 | 50     | 49 | 1  | 98.00  | 98.00  | 47     | 47 | 0  | 94.00  | 100.00 |
| UMI-VarCal     | 48     | 48 | 0  | 96.00  | 100.00 | 48     | 48 | 0  | 96.00  | 100.00 | 46     | 46 | 0  | 92.00  | 100.00 |
| SiNVICT        | 54     | 49 | 5  | 98.00  | 90.74  | 56     | 49 | 7  | 98.00  | 87.50  | 56     | 47 | 9  | 94.00  | 83.93  |
| outLyzer       | 52     | 50 | 2  | 100.00 | 96.15  | 52     | 50 | 2  | 100.00 | 96.15  | 50     | 48 | 2  | 96.00  | 96.00  |
| Pisces         | 61     | 49 | 12 | 98.00  | 80.33  | 63     | 49 | 14 | 98.00  | 77.78  | 61     | 47 | 14 | 94.00  | 77.05  |
| LoFreq         | 79     | 48 | 31 | 96.00  | 60.76  | 91     | 48 | 43 | 96.00  | 52.75  | 91     | 46 | 45 | 92.00  | 50.55  |

NC: number of calls; NM: number of mutations; TP: true positive; FP: false positive; S: sensitivity; P: precision.

**Table S6.** Performance of eight low-frequency variant callers on simulated datasets with different sequencing depths (1000X, 5000X, 10000X, 15000X, 20000X, and 25000X) at a VAF of 1%.

| Variant caller | 1000X  |    |    |       |        | 5000X  |    |    |       |        | 10000X |    |    |       |        |
|----------------|--------|----|----|-------|--------|--------|----|----|-------|--------|--------|----|----|-------|--------|
|                | NC     | TP | FP | S(%)  | P(%)   | NC     | TP | FP | S(%)  | P(%)   | NC     | TP | FP | S(%)  | P(%)   |
| DeepSNVMiner   | 44     | 44 | 0  | 88.00 | 100.00 | 44     | 44 | 0  | 88.00 | 100.00 | 44     | 44 | 0  | 88.00 | 100.00 |
| MAGERI         | 40     | 39 | 1  | 78.00 | 97.50  | 41     | 41 | 0  | 82.00 | 100.00 | 41     | 41 | 0  | 82.00 | 100.00 |
| smCounter2     | 0      | 0  | 0  | 0.00  | 0.00   | 0      | 0  | 0  | 0.00  | 0.00   | 0      | 0  | 0  | 0.00  | 0.00   |
| UMI-VarCal     | 50     | 48 | 2  | 96.00 | 96.00  | 48     | 48 | 0  | 96.00 | 100.00 | 48     | 48 | 0  | 96.00 | 100.00 |
| SiNVICT        | 0      | 0  | 0  | 0.00  | 0.00   | 1      | 0  | 1  | 0.00  | 0.00   | 5      | 1  | 4  | 2.00  | 20.00  |
| outLyzer       | 0      | 0  | 0  | 0.00  | 0.00   | 1      | 0  | 1  | 0.00  | 0.00   | 2      | 1  | 1  | 2.00  | 50.00  |
| Pisces         | 1      | 0  | 1  | 0.00  | 0.00   | 9      | 1  | 8  | 2.00  | 11.11  | 14     | 4  | 10 | 8.00  | 28.57  |
| LoFreq         | 10     | 7  | 3  | 14.00 | 70.00  | 45     | 18 | 27 | 36.00 | 40.00  | 60     | 20 | 40 | 40.00 | 33.33  |
| Variant caller | 15000X |    |    |       |        | 20000X |    |    |       |        | 25000X |    |    |       |        |
|                | NC     | TP | FP | S(%)  | P(%)   | NC     | TP | FP | S(%)  | P(%)   | NC     | TP | FP | S(%)  | P(%)   |
| DeepSNVMiner   | 43     | 43 | 0  | 86.00 | 100.00 | 44     | 44 | 0  | 88.00 | 100.00 | 43     | 43 | 0  | 86.00 | 100.00 |
| MAGERI         | 41     | 41 | 0  | 82.00 | 100.00 | 41     | 41 | 0  | 82.00 | 100.00 | 41     | 41 | 0  | 82.00 | 100.00 |
| smCounter2     | 0      | 0  | 0  | 0.00  | 0.00   | 0      | 0  | 0  | 0.00  | 0.00   | 1      | 0  | 1  | 0.00  | 0.00   |
| UMI-VarCal     | 48     | 48 | 0  | 96.00 | 100.00 | 48     | 48 | 0  | 96.00 | 100.00 | 46     | 46 | 0  | 92.00 | 100.00 |
| SiNVICT        | 6      | 1  | 5  | 2.00  | 16.67  | 8      | 1  | 7  | 2.00  | 12.50  | 10     | 1  | 9  | 2.00  | 10.00  |
| outLyzer       | 3      | 1  | 2  | 2.00  | 33.33  | 3      | 1  | 2  | 2.00  | 33.33  | 3      | 1  | 2  | 2.00  | 33.33  |
| Pisces         | 18     | 5  | 13 | 10.00 | 27.78  | 21     | 7  | 14 | 14.00 | 33.33  | 21     | 7  | 14 | 14.00 | 33.33  |
| LoFreq         | 81     | 20 | 61 | 40.00 | 24.69  | 88     | 20 | 68 | 40.00 | 22.73  | 95     | 22 | 73 | 44.00 | 23.16  |

NC: number of calls; NM: number of mutations; TP: true positive; FP: false positive; S: sensitivity; P: precision.

**Table S7.** Performance of eight low-frequency variant callers on simulated datasets with different sequencing depths (1000X, 5000X, 10000X, 15000X, 20000X, and 25000X) at a VAF of 0.5%.

| Variant caller | 1000X  |    |    |       |        | 5000X  |    |    |       |        | 10000X |    |    |       |        |
|----------------|--------|----|----|-------|--------|--------|----|----|-------|--------|--------|----|----|-------|--------|
|                | NC     | TP | FP | S(%)  | P(%)   | NC     | TP | FP | S(%)  | P(%)   | NC     | TP | FP | S(%)  | P(%)   |
| DeepSNVMiner   | 0      | 0  | 0  | 0.00  | 0.00   | 44     | 44 | 0  | 88.00 | 100.00 | 43     | 43 | 0  | 86.00 | 100.00 |
| MAGERI         | 1      | 0  | 1  | 0.00  | 0.00   | 41     | 41 | 0  | 82.00 | 100.00 | 41     | 41 | 0  | 82.00 | 100.00 |
| smCounter2     | 0      | 0  | 0  | 0.00  | 0.00   | 0      | 0  | 0  | 0.00  | 0.00   | 0      | 0  | 0  | 0.00  | 0.00   |
| UMI-VarCal     | 0      | 0  | 0  | 0.00  | 0.00   | 48     | 48 | 0  | 96.00 | 100.00 | 48     | 48 | 0  | 96.00 | 100.00 |
| SiNVICT        | 0      | 0  | 0  | 0.00  | 0.00   | 1      | 0  | 1  | 0.00  | 0.00   | 3      | 0  | 3  | 0.00  | 0.00   |
| outLyzer       | 0      | 0  | 0  | 0.00  | 0.00   | 1      | 0  | 1  | 0.00  | 0.00   | 1      | 0  | 1  | 0.00  | 0.00   |
| Pisces         | 1      | 0  | 1  | 0.00  | 0.00   | 9      | 0  | 9  | 0.00  | 0.00   | 10     | 0  | 10 | 0.00  | 0.00   |
| LoFreq         | 3      | 0  | 3  | 0.00  | 0.00   | 28     | 5  | 23 | 10.00 | 17.86  | 56     | 8  | 48 | 16.00 | 14.29  |
| Variant caller | 15000X |    |    |       |        | 20000X |    |    |       |        | 25000X |    |    |       |        |
|                | NC     | TP | FP | S(%)  | P(%)   | NC     | TP | FP | S(%)  | P(%)   | NC     | TP | FP | S(%)  | P(%)   |
| DeepSNVMiner   | 44     | 44 | 0  | 88.00 | 100.00 | 44     | 44 | 0  | 88.00 | 100.00 | 43     | 43 | 0  | 86.00 | 100.00 |
| MAGERI         | 41     | 41 | 0  | 82.00 | 100.00 | 41     | 41 | 0  | 82.00 | 100.00 | 41     | 41 | 0  | 82.00 | 100.00 |
| smCounter2     | 0      | 0  | 0  | 0.00  | 0.00   | 0      | 0  | 0  | 0.00  | 0.00   | 0      | 0  | 0  | 0.00  | 0.00   |
| UMI-VarCal     | 48     | 48 | 0  | 96.00 | 100.00 | 48     | 48 | 0  | 96.00 | 100.00 | 46     | 46 | 0  | 92.00 | 100.00 |
| SiNVICT        | 5      | 0  | 5  | 0.00  | 0.00   | 7      | 0  | 7  | 0.00  | 0.00   | 9      | 0  | 9  | 0.00  | 0.00   |
| outLyzer       | 2      | 0  | 2  | 0.00  | 0.00   | 2      | 0  | 2  | 0.00  | 0.00   | 2      | 0  | 2  | 0.00  | 0.00   |
| Pisces         | 13     | 0  | 13 | 0.00  | 0.00   | 14     | 0  | 14 | 0.00  | 0.00   | 14     | 0  | 14 | 0.00  | 0.00   |
| LoFreq         | 77     | 10 | 67 | 20.00 | 12.99  | 82     | 8  | 74 | 16.00 | 9.76   | 94     | 10 | 84 | 20.00 | 10.64  |

NC: number of calls; NM: number of mutations; TP: true positive; FP: false positive; S: sensitivity; P: precision.

**Table S8.** Performance of eight low-frequency variant callers on simulated datasets with different sequencing depths (1000X, 5000X, 10000X, 15000X, 20000X, and 25000X) at a VAF of 0.25%.

| Variant caller | 1000X  |    |    |       |        | 5000X  |    |    |       |        | 10000X |    |    |       |        |
|----------------|--------|----|----|-------|--------|--------|----|----|-------|--------|--------|----|----|-------|--------|
|                | NC     | TP | FP | S(%)  | P(%)   | NC     | TP | FP | S(%)  | P(%)   | NC     | TP | FP | S(%)  | P(%)   |
| DeepSNVMiner   | 0      | 0  | 0  | 0.00  | 0.00   | 43     | 43 | 0  | 86.00 | 100.00 | 44     | 44 | 0  | 88.00 | 100.00 |
| MAGERI         | 2      | 0  | 2  | 0.00  | 0.00   | 40     | 40 | 0  | 80.00 | 100.00 | 41     | 41 | 0  | 82.00 | 100.00 |
| smCounter2     | 0      | 0  | 0  | 0.00  | 0.00   | 0      | 0  | 0  | 0.00  | 0.00   | 0      | 0  | 0  | 0.00  | 0.00   |
| UMI-VarCal     | 0      | 0  | 0  | 0.00  | 0.00   | 48     | 48 | 0  | 96.00 | 100.00 | 47     | 47 | 0  | 94.00 | 100.00 |
| SiNVICT        | 0      | 0  | 0  | 0.00  | 0.00   | 2      | 0  | 2  | 0.00  | 0.00   | 3      | 0  | 3  | 0.00  | 0.00   |
| outLyzer       | 0      | 0  | 0  | 0.00  | 0.00   | 1      | 0  | 1  | 0.00  | 0.00   | 1      | 0  | 1  | 0.00  | 0.00   |
| Pisces         | 1      | 0  | 1  | 0.00  | 0.00   | 8      | 0  | 8  | 0.00  | 0.00   | 11     | 0  | 11 | 0.00  | 0.00   |
| LoFreq         | 4      | 0  | 4  | 0.00  | 0.00   | 24     | 0  | 24 | 0.00  | 0.00   | 57     | 1  | 56 | 2.00  | 1.75   |
| Variant caller | 15000X |    |    |       |        | 20000X |    |    |       |        | 25000X |    |    |       |        |
|                | NC     | TP | FP | S(%)  | P(%)   | NC     | TP | FP | S(%)  | P(%)   | NC     | TP | FP | S(%)  | P(%)   |
| DeepSNVMiner   | 44     | 44 | 0  | 88.00 | 100.00 | 44     | 44 | 0  | 88.00 | 100.00 | 43     | 43 | 0  | 86.00 | 100.00 |
| MAGERI         | 41     | 41 | 0  | 82.00 | 100.00 | 40     | 40 | 0  | 80.00 | 100.00 | 41     | 41 | 0  | 82.00 | 100.00 |
| smCounter2     | 0      | 0  | 0  | 0.00  | 0.00   | 0      | 0  | 0  | 0.00  | 0.00   | 0      | 0  | 0  | 0.00  | 0.00   |
| UMI-VarCal     | 48     | 48 | 0  | 96.00 | 100.00 | 47     | 47 | 0  | 94.00 | 100.00 | 46     | 46 | 0  | 92.00 | 100.00 |
| SiNVICT        | 5      | 0  | 5  | 0.00  | 0.00   | 8      | 0  | 8  | 0.00  | 0.00   | 9      | 0  | 9  | 0.00  | 0.00   |
| outLyzer       | 2      | 0  | 2  | 0.00  | 0.00   | 2      | 0  | 2  | 0.00  | 0.00   | 2      | 0  | 2  | 0.00  | 0.00   |
| Pisces         | 13     | 0  | 13 | 0.00  | 0.00   | 14     | 0  | 14 | 0.00  | 0.00   | 14     | 0  | 14 | 0.00  | 0.00   |
| LoFreq         | 69     | 3  | 66 | 6.00  | 4.35   | 72     | 3  | 69 | 6.00  | 4.17   | 85     | 3  | 82 | 6.00  | 3.53   |

NC: number of calls; NM: number of mutations; TP: true positive; FP: false positive; S: sensitivity; P: precision.

**Table S9.** Performance of eight low-frequency variant callers on simulated datasets with different sequencing depths (1000X, 5000X, 10000X, 15000X, 20000X, and 25000X) at a VAF of 0.1%.

| Variant caller | 1000X  |    |    |       |        | 5000X  |    |    |       |        | 10000X |    |    |       |        |
|----------------|--------|----|----|-------|--------|--------|----|----|-------|--------|--------|----|----|-------|--------|
|                | NC     | TP | FP | S(%)  | P(%)   | NC     | TP | FP | S(%)  | P(%)   | NC     | TP | FP | S(%)  | P(%)   |
| DeepSNVMiner   | 0      | 0  | 0  | 0.00  | 0.00   | 0      | 0  | 0  | 0.00  | 0.00   | 43     | 43 | 0  | 86.00 | 100.00 |
| MAGERI         | 2      | 0  | 2  | 0.00  | 0.00   | 0      | 0  | 0  | 0.00  | 0.00   | 38     | 38 | 0  | 76.00 | 100.00 |
| smCounter2     | 0      | 0  | 0  | 0.00  | 0.00   | 0      | 0  | 0  | 0.00  | 0.00   | 0      | 0  | 0  | 0.00  | 0.00   |
| UMI-VarCal     | 0      | 0  | 0  | 0.00  | 0.00   | 0      | 0  | 0  | 0.00  | 0.00   | 46     | 46 | 0  | 92.00 | 100.00 |
| SiNVICT        | 0      | 0  | 0  | 0.00  | 0.00   | 1      | 0  | 1  | 0.00  | 0.00   | 4      | 0  | 4  | 0.00  | 0.00   |
| outLyzer       | 0      | 0  | 0  | 0.00  | 0.00   | 1      | 0  | 1  | 0.00  | 0.00   | 1      | 0  | 1  | 0.00  | 0.00   |
| Pisces         | 1      | 0  | 1  | 0.00  | 0.00   | 8      | 0  | 8  | 0.00  | 0.00   | 11     | 0  | 11 | 0.00  | 0.00   |
| LoFreq         | 4      | 0  | 4  | 0.00  | 0.00   | 23     | 0  | 23 | 0.00  | 0.00   | 44     | 0  | 44 | 0.00  | 0.00   |
| Variant caller | 15000X |    |    |       |        | 20000X |    |    |       |        | 25000X |    |    |       |        |
|                | NC     | TP | FP | S(%)  | P(%)   | NC     | TP | FP | S(%)  | P(%)   | NC     | TP | FP | S(%)  | P(%)   |
| DeepSNVMiner   | 44     | 44 | 0  | 88.00 | 100.00 | 43     | 43 | 0  | 86.00 | 100.00 | 44     | 44 | 0  | 88.00 | 100.00 |
| MAGERI         | 41     | 41 | 0  | 82.00 | 100.00 | 39     | 39 | 0  | 78.00 | 100.00 | 41     | 41 | 0  | 82.00 | 100.00 |
| smCounter2     | 0      | 0  | 0  | 0.00  | 0.00   | 0      | 0  | 0  | 0.00  | 0.00   | 0      | 0  | 0  | 0.00  | 0.00   |
| UMI-VarCal     | 46     | 46 | 0  | 92.00 | 100.00 | 46     | 46 | 0  | 92.00 | 100.00 | 44     | 44 | 0  | 88.00 | 100.00 |
| SiNVICT        | 5      | 0  | 5  | 0.00  | 0.00   | 7      | 0  | 7  | 0.00  | 0.00   | 9      | 0  | 9  | 0.00  | 0.00   |
| outLyzer       | 2      | 0  | 2  | 0.00  | 0.00   | 2      | 0  | 2  | 0.00  | 0.00   | 2      | 0  | 2  | 0.00  | 0.00   |
| Pisces         | 13     | 0  | 13 | 0.00  | 0.00   | 14     | 0  | 14 | 0.00  | 0.00   | 14     | 0  | 14 | 0.00  | 0.00   |
| LoFreq         | 61     | 0  | 61 | 0.00  | 0.00   | 83     | 0  | 83 | 0.00  | 0.00   | 83     | 0  | 83 | 0.00  | 0.00   |

NC: number of calls; NM: number of mutations; TP: true positive; FP: false positive; S: sensitivity; P: precision.

**Table S10.** Performance of eight low-frequency variant callers on simulated datasets with different sequencing depths (1000X, 5000X, 10000X, 15000X, 20000X, and 25000X) at a VAF of 0.05%.

| Variant caller | 1000X  |    |    |      |      | 5000X  |    |    |       |        | 10000X |    |    |       |        |
|----------------|--------|----|----|------|------|--------|----|----|-------|--------|--------|----|----|-------|--------|
|                | NC     | TP | FP | S(%) | P(%) | NC     | TP | FP | S(%)  | P(%)   | NC     | TP | FP | S(%)  | P(%)   |
| DeepSNVMiner   | 0      | 0  | 0  | 0.00 | 0.00 | 0      | 0  | 0  | 0.00  | 0.00   | 0      | 0  | 0  | 0.00  | 0.00   |
| MAGERI         | 2      | 0  | 2  | 0.00 | 0.00 | 0      | 0  | 0  | 0.00  | 0.00   | 0      | 0  | 0  | 0.00  | 0.00   |
| smCounter2     | 0      | 0  | 0  | 0.00 | 0.00 | 0      | 0  | 0  | 0.00  | 0.00   | 0      | 0  | 0  | 0.00  | 0.00   |
| UMI-VarCal     | 0      | 0  | 0  | 0.00 | 0.00 | 0      | 0  | 0  | 0.00  | 0.00   | 0      | 0  | 0  | 0.00  | 0.00   |
| SiNVICT        | 0      | 0  | 0  | 0.00 | 0.00 | 2      | 0  | 2  | 0.00  | 0.00   | 3      | 0  | 3  | 0.00  | 0.00   |
| outLyzer       | 0      | 0  | 0  | 0.00 | 0.00 | 1      | 0  | 1  | 0.00  | 0.00   | 1      | 0  | 1  | 0.00  | 0.00   |
| Pisces         | 1      | 0  | 1  | 0.00 | 0.00 | 8      | 0  | 8  | 0.00  | 0.00   | 10     | 0  | 10 | 0.00  | 0.00   |
| LoFreq         | 6      | 0  | 6  | 0.00 | 0.00 | 26     | 0  | 26 | 0.00  | 0.00   | 45     | 0  | 45 | 0.00  | 0.00   |
| Variant caller | 15000X |    |    |      |      | 20000X |    |    |       |        | 25000X |    |    |       |        |
|                | NC     | TP | FP | S(%) | P(%) | NC     | TP | FP | S(%)  | P(%)   | NC     | TP | FP | S(%)  | P(%)   |
| DeepSNVMiner   | 0      | 0  | 0  | 0.00 | 0.00 | 44     | 44 | 0  | 88.00 | 100.00 | 44     | 44 | 0  | 88.00 | 100.00 |
| MAGERI         | 0      | 0  | 0  | 0.00 | 0.00 | 39     | 39 | 0  | 78.00 | 100.00 | 40     | 40 | 0  | 80.00 | 100.00 |
| smCounter2     | 0      | 0  | 0  | 0.00 | 0.00 | 0      | 0  | 0  | 0.00  | 0.00   | 0      | 0  | 0  | 0.00  | 0.00   |
| UMI-VarCal     | 0      | 0  | 0  | 0.00 | 0.00 | 42     | 42 | 0  | 84.00 | 100.00 | 40     | 40 | 0  | 80.00 | 100.00 |
| SiNVICT        | 5      | 0  | 5  | 0.00 | 0.00 | 7      | 0  | 7  | 0.00  | 0.00   | 9      | 0  | 9  | 0.00  | 0.00   |
| outLyzer       | 2      | 0  | 2  | 0.00 | 0.00 | 2      | 0  | 2  | 0.00  | 0.00   | 2      | 0  | 2  | 0.00  | 0.00   |
| Pisces         | 13     | 0  | 13 | 0.00 | 0.00 | 14     | 0  | 14 | 0.00  | 0.00   | 14     | 0  | 14 | 0.00  | 0.00   |
| LoFreq         | 71     | 0  | 71 | 0.00 | 0.00 | 76     | 0  | 76 | 0.00  | 0.00   | 82     | 0  | 82 | 0.00  | 0.00   |

NC: number of calls; NM: number of mutations; TP: true positive; FP: false positive; S: sensitivity; P: precision.

**Table S11.** Performance of eight low-frequency variant callers on simulated datasets with different sequencing depths (1000X, 5000X, 10000X, 15000X, 20000X, and 25000X) at a VAF of 0.025%.

| Variant caller | 1000X  |    |    |      |      | 5000X  |    |    |      |      | 10000X |    |    |      |      |
|----------------|--------|----|----|------|------|--------|----|----|------|------|--------|----|----|------|------|
|                | NC     | TP | FP | S(%) | P(%) | NC     | TP | FP | S(%) | P(%) | NC     | TP | FP | S(%) | P(%) |
| DeepSNVMiner   | 0      | 0  | 0  | 0.00 | 0.00 | 0      | 0  | 0  | 0.00 | 0.00 | 0      | 0  | 0  | 0.00 | 0.00 |
| MAGERI         | 1      | 0  | 1  | 0.00 | 0.00 | 0      | 0  | 0  | 0.00 | 0.00 | 0      | 0  | 0  | 0.00 | 0.00 |
| smCounter2     | 0      | 0  | 0  | 0.00 | 0.00 | 0      | 0  | 0  | 0.00 | 0.00 | 0      | 0  | 0  | 0.00 | 0.00 |
| UMI-VarCal     | 0      | 0  | 0  | 0.00 | 0.00 | 0      | 0  | 0  | 0.00 | 0.00 | 0      | 0  | 0  | 0.00 | 0.00 |
| SiNVICT        | 0      | 0  | 0  | 0.00 | 0.00 | 1      | 0  | 1  | 0.00 | 0.00 | 4      | 0  | 4  | 0.00 | 0.00 |
| outLyzer       | 0      | 0  | 0  | 0.00 | 0.00 | 1      | 0  | 1  | 0.00 | 0.00 | 1      | 0  | 1  | 0.00 | 0.00 |
| Pisces         | 1      | 0  | 1  | 0.00 | 0.00 | 9      | 0  | 9  | 0.00 | 0.00 | 10     | 0  | 10 | 0.00 | 0.00 |
| LoFreq         | 6      | 0  | 6  | 0.00 | 0.00 | 25     | 0  | 25 | 0.00 | 0.00 | 44     | 0  | 44 | 0.00 | 0.00 |
| Variant caller | 15000X |    |    |      |      | 20000X |    |    |      |      | 25000X |    |    |      |      |
|                | NC     | TP | FP | S(%) | P(%) | NC     | TP | FP | S(%) | P(%) | NC     | TP | FP | S(%) | P(%) |
| DeepSNVMiner   | 0      | 0  | 0  | 0.00 | 0.00 | 0      | 0  | 0  | 0.00 | 0.00 | 0      | 0  | 0  | 0.00 | 0.00 |
| MAGERI         | 0      | 0  | 0  | 0.00 | 0.00 | 0      | 0  | 0  | 0.00 | 0.00 | 0      | 0  | 0  | 0.00 | 0.00 |
| smCounter2     | 0      | 0  | 0  | 0.00 | 0.00 | 0      | 0  | 0  | 0.00 | 0.00 | 1      | 0  | 1  | 0.00 | 0.00 |
| UMI-VarCal     | 0      | 0  | 0  | 0.00 | 0.00 | 0      | 0  | 0  | 0.00 | 0.00 | 0      | 0  | 0  | 0.00 | 0.00 |
| SiNVICT        | 5      | 0  | 5  | 0.00 | 0.00 | 7      | 0  | 7  | 0.00 | 0.00 | 9      | 0  | 9  | 0.00 | 0.00 |
| outLyzer       | 2      | 0  | 2  | 0.00 | 0.00 | 2      | 0  | 2  | 0.00 | 0.00 | 2      | 0  | 2  | 0.00 | 0.00 |
| Pisces         | 13     | 0  | 13 | 0.00 | 0.00 | 14     | 0  | 14 | 0.00 | 0.00 | 14     | 0  | 14 | 0.00 | 0.00 |
| LoFreq         | 66     | 0  | 66 | 0.00 | 0.00 | 80     | 0  | 80 | 0.00 | 0.00 | 83     | 0  | 83 | 0.00 | 0.00 |

NC: number of calls; NM: number of mutations; TP: true positive; FP: false positive; S: sensitivity; P: precision.



**Table S12.** The execution time of each low-frequency variant caller.

| <b>Variant caller</b> | <b>5000X</b> | <b>10000X</b> | <b>15000X</b> | <b>20000X</b> | <b>25000X</b> |
|-----------------------|--------------|---------------|---------------|---------------|---------------|
| DeepSNVMiner          | 185          | 278           | 380           | 473           | 556           |
| smCounter2            | 739          | 1615          | 2524          | 3419          | 4302          |
| UMI-VarCal            | 51           | 96            | 145           | 187           | 232           |
| MAGERI                | 11           | 14            | 19            | 22            | 28            |
| SiNVICT               | 82           | 160           | 323           | 320           | 394           |
| outLyzer              | 84           | 114           | 141           | 172           | 196           |
| Pisces                | 76           | 141           | 208           | 274           | 341           |
| LoFreq                | 161          | 393           | 692           | 1061          | 1466          |

The execution time was measured in seconds.

## Supplementary Figures

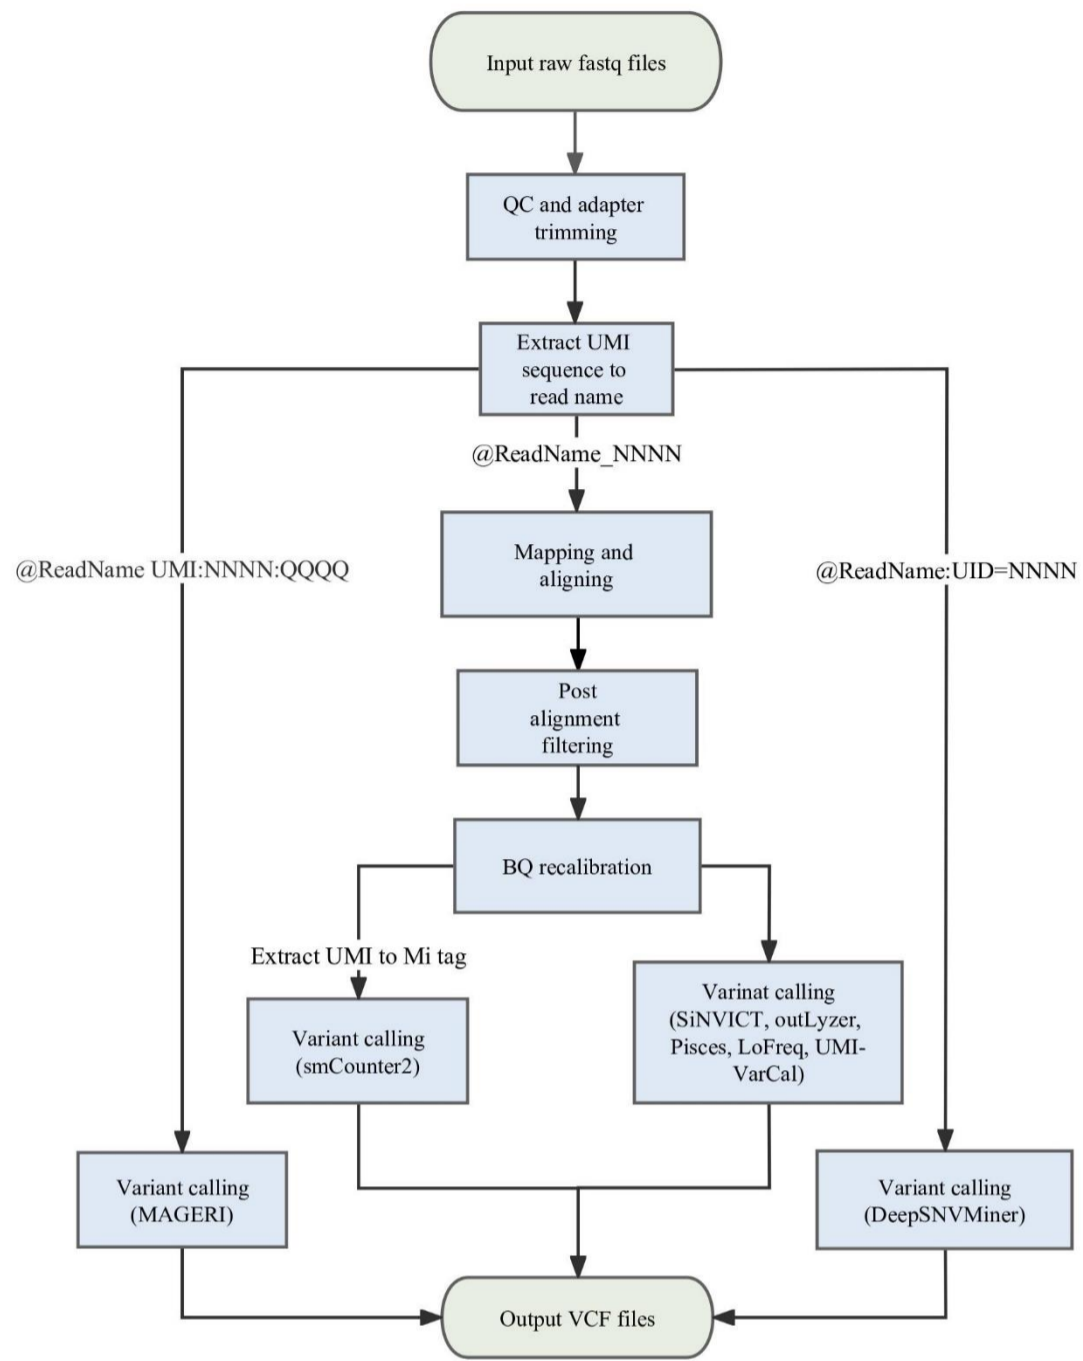

**Figure S1.** The flowchart of benchmarking analysis of eight variant calling tools.
